# Supplementary material
Source: PubMed Central journal article supplement (PMC3538817)
Supplement: NIHMS378410-supplement-Supp_Fig_S1.pdf [file NIHMS378410-supplement-Supp_Fig_S1.pdf]

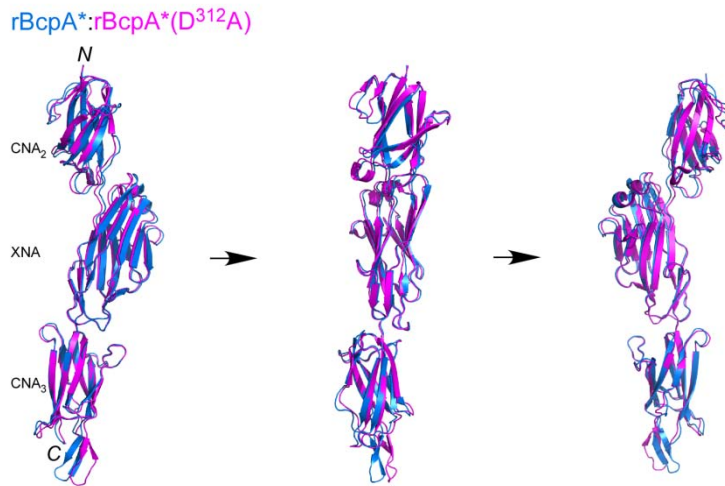

**Figure S1.** Superimposition of rBcpA\* and rBcpA\*(D<sup>312</sup>A). The X-ray crystal structure structures of rBcpA\* (blue) and rBcpA\*(D<sup>312</sup>A) were superimposed revealing a high degree of similarity.
